# Supplementary material for: Metallic 1T phase MoS2 nanosheets as a highly efficient co-catalyst for the photocatalytic hydrogen evolution of CdS nanorods
Source: Royal Society of Chemistry journal article supplement (doi:10.1039/c6ra10170d), 2016-01-01
Supplement: c6ra10170d1.pdf [file c6ra10170d1.pdf]

## Supporting Information

### Metallic 1T Phase MoS<sub>2</sub> Nanosheets as Highly Efficient Co-catalyst for the Photocatalytic Hydrogen Evolution of CdS Nanorods

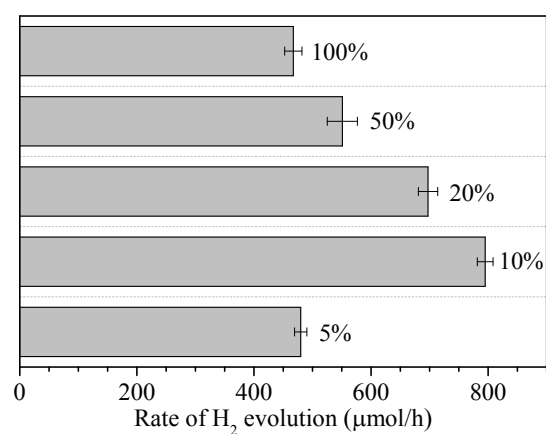

Figure S1. H<sub>2</sub> evolution rate over photocatalysts with different weight ratio of 1T-MoS<sub>2</sub> to CdS NRs.

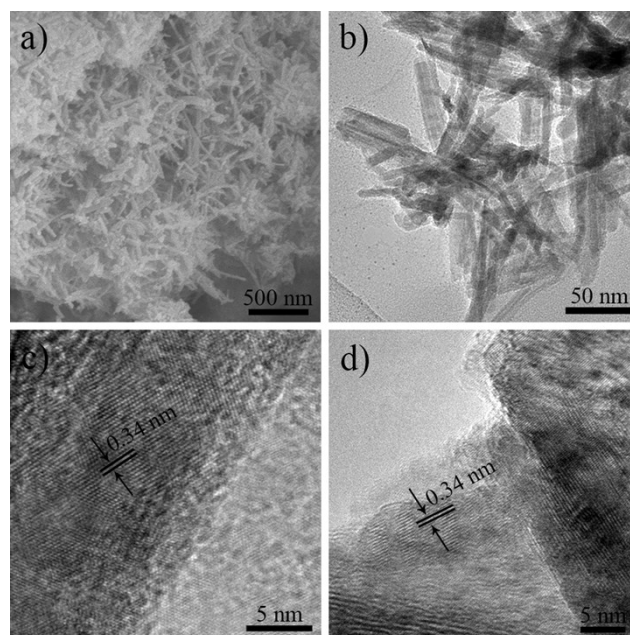

Figure S2. (a) SEM image of CdS NRs and (b) TEM image of CdS NRs. HRTEM images of (c) 1T-MoS<sub>2</sub>/CdS NRs and (d) 2H-MoS<sub>2</sub>/CdS NRs.

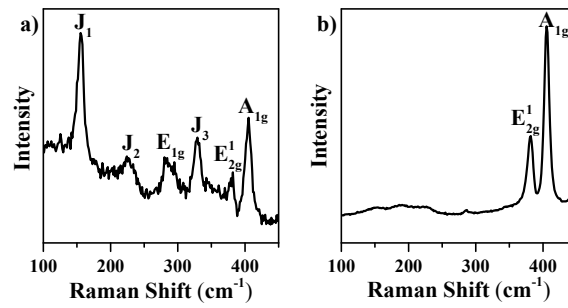

Figure S3. Raman spectra of (a) 1T-MoS<sub>2</sub> and (b) 2H-MoS<sub>2</sub>.

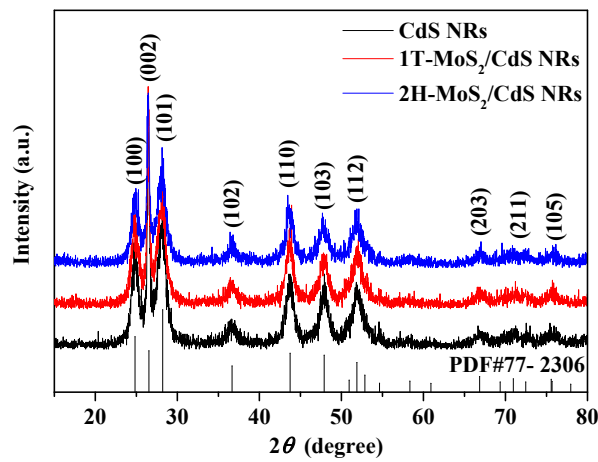

Figure S4. XRD patterns of CdS NRs, 1T-MoS<sub>2</sub>/CdS NRs and 2H-MoS<sub>2</sub>/CdS NRs.

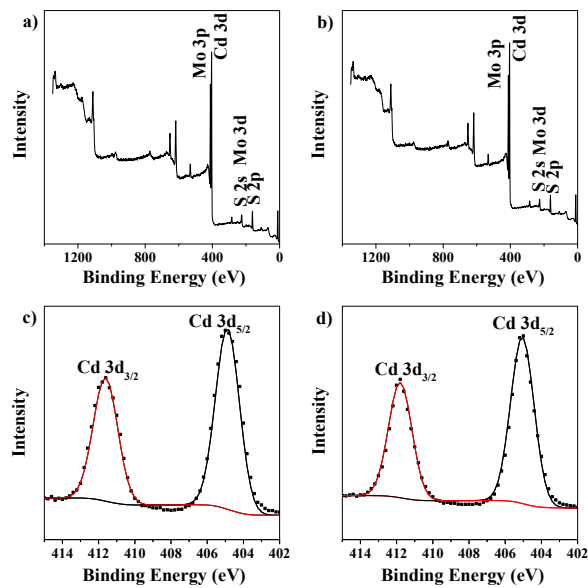

Figure S5. XPS survey spectra of (a) 1T-MoS<sub>2</sub>/CdS NRs and (b) 2H-MoS<sub>2</sub>/CdS NRs. The high-resolution XPS spectra of Cd (3d) of (c) 1T-MoS<sub>2</sub>/CdS NRs and (d) 2H-MoS<sub>2</sub>/CdS NRs.
